# Supplementary material for: Mocha tyrosinase variant: a new flavour of cat coat coloration
Source: PubMed Central journal article supplement (PMC6590430; doi:10.1111/age.12765), 2019-02-04

**Figure S1** Pedigree depicting mocha coloration inheritance in Burmese cats. Circles represent female and squares represent males. The cat with the arrow is the proband mocha-colored cat. Solid symbols indicate homozygous for  $c^m$  allele, half-filled indicate heterozygous for  $c^m$  allele, and open indicate wildtype for  $c^m$  allele (i.e., no  $c^m$  allele). Cats with ID numbers were genotyped for the *color* (*C*) locus alleles by Sanger sequencing, and they are listed below. The exon 2 duplication genotypes are presented as  $+/+$  for homozygous duplication,  $+/-$  as heterozygous, and  $-/-$  as wildtype. The six cats with a dot in the upper right of symbol were Sanger sequenced for all five *TYR* exons.

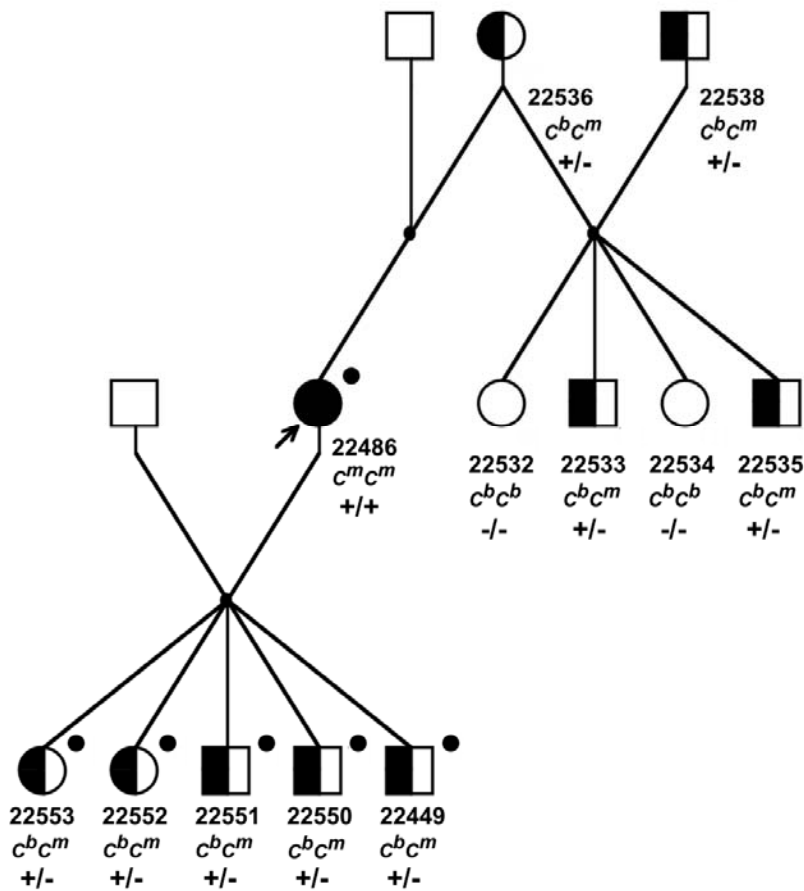

Supplement: AGE-50-182-s001.pdf [file AGE-50-182-s001.pdf]
