# Supplementary material for: Mocha tyrosinase variant: a new flavour of cat coat coloration
Source: PubMed Central journal article supplement (PMC6590430; doi:10.1111/age.12765), 2019-02-04

**Figure S2** Gel electrophoresis of *TYR* exon 2 for mocha coloration. A 100-bp ladder is presented with the brightest band at 500 bp. (a) Homozygous variant (\*) ~851 bp, a heterozygous carrier cat (\*\*), a wildtype cat (†) ~688 bp, and a negative control (‡) for genomic DNA (b) cDNA amplicons for *TYR* exon 2 tandem duplication, amplified by primer 2 and primer 1–2 respectively. A 986 bp including exon 1–2 was expected and identified in the wildtype cat, whereas the cat with mocha coloration showed a smaller amplicon of 875 bp.

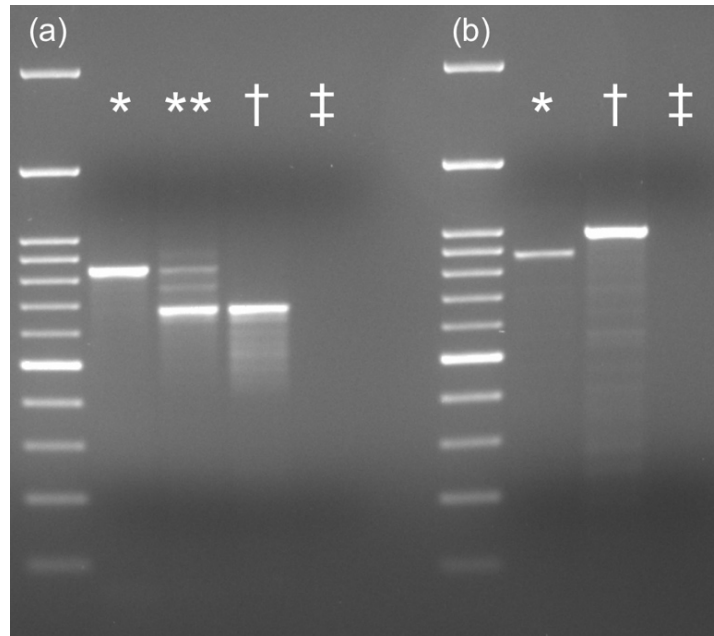

Supplement: AGE-50-182-s002.pdf [file AGE-50-182-s002.pdf]
