# Supplementary material for: Mocha tyrosinase variant: a new flavour of cat coat coloration
Source: PubMed Central journal article supplement (PMC6590430; doi:10.1111/age.12765), 2019-02-04
Supplement: AGE-50-182-s003.pdf [file AGE-50-182-s003.pdf]

**Figure S3** Partial nucleotide alignment of *TYR* in feline and other species. *TYR* nucleotide sequences are aligned from wildtype cat (*Felis catus*), mocha colored cat, dog [*Canis familiaris*; NC\_006603.3 (CanFam3.1)], rabbit [*Oryctolagus cuniculus*; NC\_013669.1 (OryCun2.0)], cow [*Bos Taurus*; NC\_037356.1 (ARS-UCD1.2)], human [*Homo sapiens*; NC\_000011.10 (GRCh38.p12)], mouse [*Mus musculus*; NC\_000073.6 (GRCm38.p4)]. Intronic sequence is lowercase; exonic sequence is uppercase. Identical nucleotides to *Felis catus* are represented as dot (.). Nucleotides deleted in the mocha-coated cat are represented as a dash (-). Sequence is presented from the 3' portion of exon 1 to the 5' portion of exon 3. Green bars indicate additional intronic sequence. An asterisk (\*) indicates the Siamese 'pointed' mutation (p.Gly302Arg). The mocha-coated cat has a 39 amino acid deletion (yellow highlight) and two amino acid insertion (pink highlight) caused by the presence of the new splicing acceptor site (tag) followed by the intronic 6 bp 5' of the duplicated partial exon 2 (blue highlight). Therefore, the mocha-coated cat has a 117-bp deletion concurrent with a 6-bp alternative transcription resulting in the c.820\_936delinsAATCTC (p.Ile274\_Leu312delinsAsnLeu) altered transcript.

|                        | Exon 1      | Intron 1   | Intron 1    | Exon 2                |                   |
|------------------------|-------------|------------|-------------|-----------------------|-------------------|
|                        |             |            |             | I I C T R L E E Y N   |                   |
| Felis catus (wildtype) | CTCTTGGCAG  | gtaagacatc | ttttgtgtag  | ATCATCTGTA CCCGATTGGA | GGAGTACAAT        |
| Felis catus (mocha)    | .....       | .....      | .....       | .....                 | .....             |
| Canis familiaris       | .....       | .....      | .....       | ...G...C. ....C...    | .....C            |
| Oryctolagus cuniculus  | .....tg.a   | .....ac..  | ..T.....    | G...G.....            | .....             |
| Bos Taurus             | .....gtg.g  | ..C...c.   | ..G...C.    | G.A..C....            | .....C            |
| Homo sapiens           | .....t.g    | .....ac..  | ..TG....    | G.....                | .....C            |
| Mus musculus           | ..C.....    | .....tgca  | ..tcac..    | ...T....              | G.A...CA. A...T.. |
| Consensus              | ctcttggcag  | gtaagatntn | TTTTGTNCAG  | ATCNTCTGTA GCCGATTGGA | GGAGTACAAN 60     |
|                        |             |            |             |                       | *                 |
|                        | S R Q A L C | D G T P    | E G P L L R | N P G N               |                   |
| Felis catus (wildtype) | AGCCGTCAGG  | CTTTATGTGA | TGGAACTCCA  | GAGGGACCAT TACTGCGCAA | TCCCGGAAAC        |
| Felis catus (mocha)    | .....       | .....      | .....       | .....                 | .....             |
| Canis familiaris       | ....A...    | .....C..   | .....       | .....G. ....          | ..T.G..           |
| Oryctolagus cuniculus  | ....A...A   | GC.....A.  | ..C...T.C   | .....C. .G.....       | ..T.....          |
| Bos Taurus             | ..T..C...   | .....CA.   | C..G..GT.T  | .....                 | ..T.....          |
| Homo sapiens           | ....A...T   | .....CA.   | .....G..C   | .....T. ....          | ..G..T..          |
| Mus musculus           | ....A...T   | .....C..   | .....A..T   | .....C ..T.A..T..     | ..T.....          |
| Consensus              | AGCCGTCAGG  | CTTTATGCNA | TGGAACTCCN  | GAGGGACCAT TACTGCGCAA | TCCTGGAAAC 120    |
|                        | H D K A R T | P R L P    | S S A D V E | F C L S               |                   |
| Felis catus (wildtype) | CATGACAAAG  | CCAGGACCCC | AAGGCTCCCC  | TCCTCTGCTG ATGTGGAATT | TTGCCTAAGT        |
| Felis catus (mocha)    | .....       | .....      | .....       | .....                 | .....             |
| Canis familiaris       | .....       | .....      | ..A.....    | .....                 | C....G..          |
| Oryctolagus cuniculus  | .....       | .....T..   | G.....      | ....AT.A.             | .....             |
| Bos Taurus             | ..C.....    | .....A.G   | G.....      | .....G....            | .....G..          |
| Homo sapiens           | .....T      | ..A.....   | .....       | ..T.A....             | .....A....        |
| Mus musculus           | .....       | ..AA.....  | C.....A     | ..T.A..A.             | .....T..G..       |
| Consensus              | CATGACAAAG  | CCAGGACCCC | AAGGCTCCCC  | TCCTCAGCTG ATGTGGAATT | TTGCCTGAGT 180    |
|                        | L T Q Y E S | D S M D    | K A A N F S | F R N T               |                   |
| Felis catus (wildtype) | CTGACACAAT  | ATGAATCGGA | TTCCATGGAT  | AAAGCTGCCA ATTTACGCTT | TAGGAATACA        |
| Felis catus (mocha)    | .....       | .....      | .....       | .....                 | .....             |
| Canis familiaris       | .....C..G.  | .....      | .....       | .....                 | .....A.....       |
| Oryctolagus cuniculus  | .....C..G.  | .....T.G   | .....C      | .....                 | .....A.....       |
| Bos taurus             | T....C..G.  | .....A.G   | .....       | .....                 | .....A....C       |
| Homo sapiens           | T....C...   | .....T.G   | .....       | .....                 | .....A.....       |
| Mus musculus           | T....C..G.  | .....T.G   | A..A.....   | .G.A.....             | .....A..C...      |
| Consensus              | NTGACCCAGT  | ATGAATCTGG | TTCCATGGAT  | AAAGCTGCCA ATTTACGCTT | TAGAAATACA 240    |
|                        | L E         |            |             |                       |                   |
| Felis catus (wildtype) | CTGGAAGgta  | actcccattt | atcaactcatt | taaaatttct tctgtttttc | tgaatcatgt        |
| Felis catus (mocha)    | .....       | .....      | .....       | .....                 | .....             |
| Canis familiaris       | .....       | ..c...ccga | cctttat.c.  | c.tttaaaa. .tct.c.g.t | .ttc.g.ac.        |
| Oryctolagus cuniculus  | .....       | .g...tt.a  | t.tcaactca. | atth...t. .t.tc.gaat  | .tgtgtt.a.        |
| Bos taurus             | .....       | .acg.tt..  | c.ttt.tt..  | .c.ctca.t. aaat..cct  | .ttt..tgaa        |
| Homo sapiens           | .....       | .tct.tt.c. | t.tcaact..  | a.ttt...t. ctgaa..cat | attta.gtc         |
| Mus musculus           | .....       | .tat..t.g. | g.tca.t.a.  | .ttg...t. .t.aa...at  | aatt..t.t.        |
| Consensus              | CTGGAAGgta  | ancccntntn | nttcattatt  | tatntntttt tttttttnat | tttttcntnt 300    |
|                        | N I         |            |             |                       |                   |
| Felis catus (wildtype) | ttagaatctc  | ttaccaacag | GATTTGCTAG  |                       |                   |
| Felis catus (mocha)    | .....       | .....      | .....       |                       |                   |
| Canis familiaris       | cct.tt.a.a  | C.....     | .....       |                       |                   |
| Oryctolagus cuniculus  | aatctc.ta.  | .....      | .....A      |                       |                   |
| Bos taurus             | ..tatg.t.a  | .g.....    | .....GA     |                       |                   |
| Homo sapiens           | .ctt.tc.aa  | .a.tg....  | .....       |                       |                   |
| Mus musculus           | caga...tct  | a.tt.....  | .....C..    |                       |                   |
| Consensus              | tntnnntta   | ttaccaacag | GATTTGCTAG  |                       | 330               |
|                        | Intron 2    | Intron 2   | Exon 3      |                       |                   |
