# Supplementary material for: Mocha tyrosinase variant: a new flavour of cat coat coloration
Source: PubMed Central journal article supplement (PMC6590430; doi:10.1111/age.12765), 2019-02-04
Supplement: AGE-50-182-s004.pdf [file AGE-50-182-s004.pdf]

**Table S1** PCR primers for the amplification of feline *TYR*.

| <i>TYR</i> exon                 | Primer sequence (5'-3')                                       | Size (bp) | Exon size (bp) | Annealing temp. (°C) |
|---------------------------------|---------------------------------------------------------------|-----------|----------------|----------------------|
| <b>Genomic; forward/reverse</b> |                                                               |           |                |                      |
| 1                               | GGGACTGGTGTATATAGGTCTTAGC<br>TAATAGAGGACCTTTGCTACTCTTGG       | 1076      | 1045           | 55                   |
| 1-F2*                           | TCAATGTTTATGACCTCTTCGTCTGGA                                   | 448       | 1045           | 55                   |
| 2                               | CTAGATTTTAACTTTCACTGCTTACGC<br>AAAATTCTGCCTTCTTAAACATATCTGG   | 688       | 217            | 55                   |
| 2N <sup>†</sup>                 | CACCCAGATGCCTGTCAAC<br>TGGATTATGGTGTGCTGCTC                   | 494       | 217            | 63                   |
| 3                               | CCTACTACAGCATGAATTTTATTACTTTGAA<br>AATCCGATCTGAGACAACAAAGTACC | 395       | 148            | 55                   |
| 4                               | CATGTCTTGGAATTTAAGATATGCTG<br>AATGATAAATTAAGGTTTGTAGTATGCTTTC | 428       | 182            | 55                   |
| 5                               | ACTAAGTAGCAGAGCTGACATTCAAAC<br>AATTCTGGTAAACAGTCTTCACAAACC    | 504       | 761            | 55                   |
| <b>cDNA</b>                     |                                                               |           |                |                      |
| 1-2                             | TCCGTGAAGACGAGGGTAAG<br>AGGCAAAATTCCACATCAGC                  | 986       |                | 60                   |
| 1-3/4                           | GCATCCTTCTTCTCCTCTTGG<br>TTCAAAAATACTGTCAACAAATGC             | 399       |                | 58                   |
| 2/3-5                           | TGGAAGGATTTGCTAGTCCAC<br>GGGACTGCTCTTGGAACATC                 | 656       |                | 58                   |

\*Primer 1 and primer 1-F2 use the same reverse primer for feline *TYR* amplification of exon 1.

<sup>†</sup>Both primer 2 and primer 2N amplify the entire exon 2, but primer 2N was newly designed to sequence the entire duplicated region.
