# Supplementary material for: Mocha tyrosinase variant: a new flavour of cat coat coloration
Source: PubMed Central journal article supplement (PMC6590430; doi:10.1111/age.12765), 2019-02-04
Supplement: AGE-50-182-s005.pdf [file AGE-50-182-s005.pdf]

**Table S2** *TYR* exonic SNV genotypes in cats.

| Cat ID*        | Phenotype <sup>‡</sup> | Mocha (c <sup>m</sup> )                    | Burmese (c <sup>b</sup> ) | Siamese (c <sup>s</sup> ) |
|----------------|------------------------|--------------------------------------------|---------------------------|---------------------------|
|                |                        | c.820_936delinsAATCTC<br>I274_L312delinsNL | c.679G>T<br>p.G227W       | c.904G>A<br>p.G302R       |
| 22449          | –                      | +/-                                        | G/T                       | G/G                       |
| 22450          | –                      | +/-                                        | G/T                       | G/G                       |
| 22451          | –                      | +/-                                        | G/T                       | G/G                       |
| 22452          | –                      | +/-                                        | G/T                       | G/G                       |
| 22453          | –                      | +/-                                        | G/T                       | G/G                       |
| 22486          | Mocha                  | +/+                                        | G/G                       | G/G                       |
| 22532          | Sable                  | -/-                                        | T/T                       | G/G                       |
| 22533          | Burmocha               | +/-                                        | G/T                       | G/G                       |
| 22534          | Sable                  | -/-                                        | T/T                       | G/G                       |
| 22535          | Burmocha               | +/-                                        | G/T                       | G/G                       |
| 22536          | Sable                  | +/-                                        | G/T                       | G/G                       |
| 22538          | Sable                  | +/-                                        | G/T                       | G/G                       |
| 1              | Light brown            | +/-                                        | G/T                       | G/G                       |
| 2 <sup>†</sup> | Tortoiseshell          | -/-                                        | G/T                       | G/G                       |
| 3              | Light brown            | +/-                                        | G/T                       | G/G                       |
| 4              | Light brown            | +/-                                        | G/T                       | G/G                       |
| 5              | Mocha                  | +/+                                        | G/G                       | G/G                       |
| 6              | Light brown            | +/-                                        | G/T                       | G/G                       |
| 7              | Light brown            | +/-                                        | G/T                       | G/G                       |
| 8              | Mocha                  | +/+                                        | G/G                       | G/G                       |

\*Cats 1 – 8 were genotyped by commercial services for Burmese and Siamese allele. <sup>†</sup>Parent of cat 3 and 4.

<sup>‡</sup>Phenotype was listed only when coat colors of the cats were supported by photographs.
