# Supplementary material for: Mocha tyrosinase variant: a new flavour of cat coat coloration
Source: PubMed Central journal article supplement (PMC6590430; doi:10.1111/age.12765), 2019-02-04
Supplement: AGE-50-182-s006.pdf [file AGE-50-182-s006.pdf]

**Table S3** Genotyping of Thailand cat populations for the *TYR* mocha variant.

| Population  | No. | Coloration      | Exon 2 dup |
|-------------|-----|-----------------|------------|
| Thai        | 5   | Chocolate-point | -/-        |
| Khao Manee  | 20  | White           | -/-        |
| Random bred | 2   | Unknown         | +/-        |
| Random bred | 26  | Unknown         | -/-        |
